# Supplementary material for: Design and Prediction of a Novel Two-Dimensional Carbon Nanostructure with In-Plane Negative Poisson’s Ratio
Source: Hindawi journal article supplement (doi:10.1155/2019/8618159), 2019-02-25
Supplement: f1 [file 8618159.f1.docx]

***Supporting information***

**Design and Prediction of Novel Two-Dimensional Carbon Nano-Structure with in-Plane Negative Poission’s Ratio**

Kun Yuana,b,c[[1]](#footnote-1)*, Meng-Yang Li b, Yan-Zhi Liua, Ren-Zhong Lic

*a College of Chemical Engineering and Technology, Tianshui Normal University, Tianshui 741001, China*

*b Institute for Chemical Physics & Department of Chemistry, School of Science, State Key Laboratory of Electrical Insulation and Power Equipment, School of Mechanical Engineering, Xi’an Jiaotong University, Xi’an 710049, China*

*c School of Environmental and Chemical Engineering, Xi’an Polytechnic University, Xi’an 710049, China*

**Contents:**

Figure S1 The pre-optimized minimum basic-structural-unit

Figure S2 The pre-optimized hexamer of the basic-structural-unit

Table S1 The frequency analysis result for the preodical structure of GL-2D-1

Table S2 The frequency analysis result for the preodical structure of GL-2D-2

Figure S3 The molecular dynamic simulations of the hexamer of the basic-structural-unit of GL-2D-1 and GL-2D-2

Table S3 Stiffness matrix (coefficients in GPa) of GL-2D-1

Table S4 Eigenvalue of stiffness matrix of GL-2D-1

Table S5 Modulus of GL-2D-1 under different model

Table S6 Stiffness matrix (coefficients in GPa) of GL-2D-2

Table S7 Eigenvalue of stiffness matrix of GL-2D-2

Table S8 Modulus of GL-2D-2 under different model

Figure S4 The configuration of the supercell of GL-2D-2 at three orthogonal directions of *a, b, c* and standard orientation

**
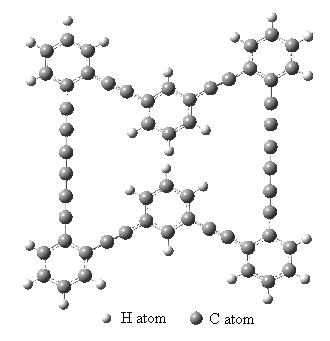
**

Figure S1 The pre-optimized minimum basic-structural-unit

**
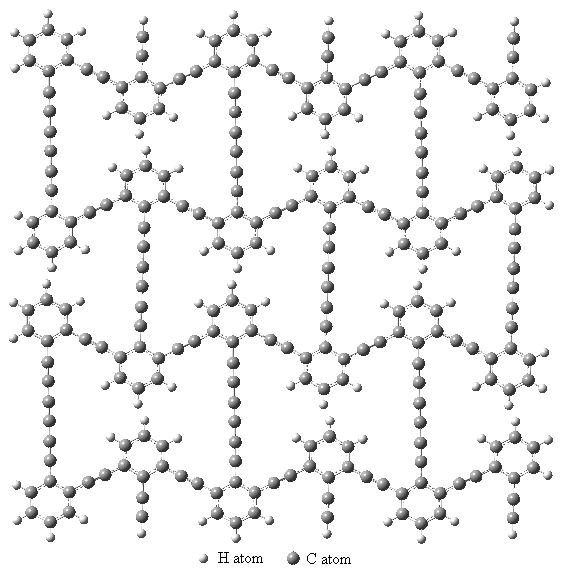
**

Figure S2 The pre-optimized hexamer of the basic-structural-unit


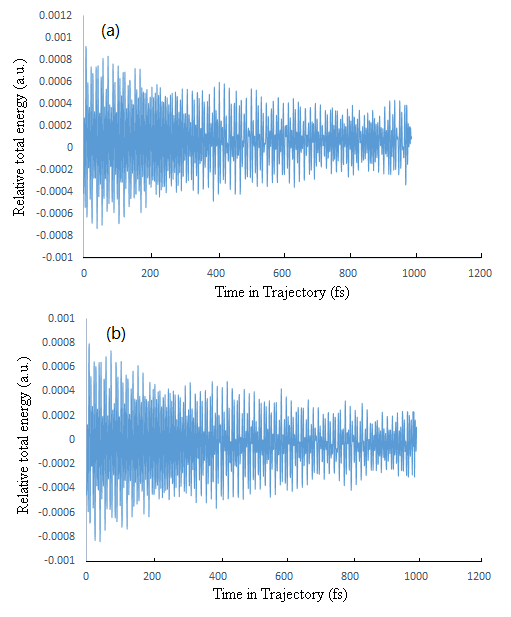


Figure S3 The molecular dynamic simulations of the hexamer of the basic-structural-unit of GL-2D-1 and GL-2D-2

Table S1 The frequency analysis result for the preodical structure of GL-2D-1

| 1 | 3141.293 | cm-1 | 56 | 1176.034 | cm-1 | 111 | 499.7473 | cm-1 |
| --- | --- | --- | --- | --- | --- | --- | --- | --- |
| 2 | 3140.397 | cm-1 | 57 | 1169.297 | cm-1 | 112 | 495.3725 | cm-1 |
| 3 | 3139.799 | cm-1 | 58 | 1168.18 | cm-1 | 113 | 492.1939 | cm-1 |
| 4 | 3138.55 | cm-1 | 59 | 1110.941 | cm-1 | 114 | 486.5409 | cm-1 |
| 5 | 3129.188 | cm-1 | 60 | 1108.777 | cm-1 | 115 | 475.0341 | cm-1 |
| 6 | 3128.011 | cm-1 | 61 | 1076.543 | cm-1 | 116 | 470.9531 | cm-1 |
| 7 | 3127.935 | cm-1 | 62 | 1074.13 | cm-1 | 117 | 464.534 | cm-1 |
| 8 | 3123.838 | cm-1 | 63 | 1052.745 | cm-1 | 118 | 463.1632 | cm-1 |
| 9 | 3116.179 | cm-1 | 64 | 1052.178 | cm-1 | 119 | 461.2184 | cm-1 |
| 10 | 3114.916 | cm-1 | 65 | 1047.781 | cm-1 | 120 | 433.1026 | cm-1 |
| 11 | 3113.977 | cm-1 | 66 | 1046.72 | cm-1 | 121 | 430.3757 | cm-1 |
| 12 | 3111.685 | cm-1 | 67 | 972.7677 | cm-1 | 122 | 429.7628 | cm-1 |
| 13 | 2263.596 | cm-1 | 68 | 971.8653 | cm-1 | 123 | 424.8824 | cm-1 |
| 14 | 2263.121 | cm-1 | 69 | 971.3098 | cm-1 | 124 | 420.0159 | cm-1 |
| 15 | 2258.831 | cm-1 | 70 | 970.5203 | cm-1 | 125 | 415.4238 | cm-1 |
| 16 | 2257.604 | cm-1 | 71 | 909.7557 | cm-1 | 126 | 393.955 | cm-1 |
| 17 | 2195.927 | cm-1 | 72 | 908.5301 | cm-1 | 127 | 374.3055 | cm-1 |
| 18 | 2188.438 | cm-1 | 73 | 906.0305 | cm-1 | 128 | 372.3385 | cm-1 |
| 19 | 2145.67 | cm-1 | 74 | 904.7145 | cm-1 | 129 | 371.7801 | cm-1 |
| 20 | 2135.113 | cm-1 | 75 | 868.8978 | cm-1 | 130 | 362.5002 | cm-1 |
| 21 | 2081.396 | cm-1 | 76 | 863.6762 | cm-1 | 131 | 343.6599 | cm-1 |
| 22 | 2075.617 | cm-1 | 77 | 829.905 | cm-1 | 132 | 314.316 | cm-1 |
| 23 | 1573.549 | cm-1 | 78 | 829.7383 | cm-1 | 133 | 306.4264 | cm-1 |
| 24 | 1572.904 | cm-1 | 79 | 798.8076 | cm-1 | 134 | 299.5502 | cm-1 |
| 25 | 1553.964 | cm-1 | 80 | 797.1024 | cm-1 | 135 | 290.0144 | cm-1 |
| 26 | 1551.446 | cm-1 | 81 | 794.8509 | cm-1 | 136 | 286.3519 | cm-1 |
| 27 | 1547.682 | cm-1 | 82 | 791.4694 | cm-1 | 137 | 274.8504 | cm-1 |
| 28 | 1547.337 | cm-1 | 83 | 789.7203 | cm-1 | 138 | 271.9869 | cm-1 |
| 29 | 1530.964 | cm-1 | 84 | 763.9175 | cm-1 | 139 | 246.329 | cm-1 |
| 30 | 1530.404 | cm-1 | 85 | 740.0795 | cm-1 | 140 | 245.4623 | cm-1 |
| 31 | 1479.419 | cm-1 | 86 | 736.473 | cm-1 | 141 | 242.336 | cm-1 |
| 32 | 1478.815 | cm-1 | 87 | 733.5422 | cm-1 | 142 | 227.0298 | cm-1 |
| 33 | 1472.446 | cm-1 | 88 | 732.2576 | cm-1 | 143 | 181.8106 | cm-1 |
| 34 | 1463.328 | cm-1 | 89 | 731.1162 | cm-1 | 144 | 178.4128 | cm-1 |
| 35 | 1425.275 | cm-1 | 90 | 660.8975 | cm-1 | 145 | 176.0092 | cm-1 |
| 36 | 1424.557 | cm-1 | 91 | 656.5894 | cm-1 | 146 | 165.2704 | cm-1 |
| 37 | 1419.397 | cm-1 | 92 | 609.8256 | cm-1 | 147 | 162.2456 | cm-1 |
| 38 | 1404.213 | cm-1 | 93 | 609.5107 | cm-1 | 148 | 160.9605 | cm-1 |
| 39 | 1390.659 | cm-1 | 94 | 601.7049 | cm-1 | 149 | 159.4149 | cm-1 |
| 40 | 1380.715 | cm-1 | 95 | 601.015 | cm-1 | 150 | 150.919 | cm-1 |
| 41 | 1345.301 | cm-1 | 96 | 592.3188 | cm-1 | 151 | 128.9967 | cm-1 |
| 42 | 1342.339 | cm-1 | 97 | 591.7975 | cm-1 | 152 | 123.4037 | cm-1 |
| 43 | 1326.175 | cm-1 | 98 | 583.0328 | cm-1 | 153 | 114.0764 | cm-1 |
| 44 | 1325.388 | cm-1 | 99 | 582.2547 | cm-1 | 154 | 111.2367 | cm-1 |
| 45 | 1315.875 | cm-1 | 100 | 567.59 | cm-1 | 155 | 94.36352 | cm-1 |
| 46 | 1314.635 | cm-1 | 101 | 550.4981 | cm-1 | 156 | 76.25464 | cm-1 |
| 47 | 1301.007 | cm-1 | 102 | 546.6985 | cm-1 | 157 | 72.56822 | cm-1 |
| 48 | 1300.118 | cm-1 | 103 | 546.4853 | cm-1 | 158 | 72.19744 | cm-1 |
| 49 | 1237.624 | cm-1 | 104 | 544.9174 | cm-1 | 159 | 71.57795 | cm-1 |
| 50 | 1232.3 | cm-1 | 105 | 541.5298 | cm-1 | 160 | 70.37168 | cm-1 |
| 51 | 1206.252 | cm-1 | 106 | 523.5166 | cm-1 | 161 | 68.77282 | cm-1 |
| 52 | 1205.605 | cm-1 | 107 | 523.1438 | cm-1 | 162 | 62.27179 | cm-1 |
| 53 | 1180.082 | cm-1 | 108 | 509.3284 | cm-1 | 163 | 53.35977 | cm-1 |
| 54 | 1179.625 | cm-1 | 109 | 508.2135 | cm-1 | 164 | 52.68078 | cm-1 |
| 55 | 1177.574 | cm-1 | 110 | 504.3305 | cm-1 | 165 | 20.08766 | cm-1 |

Table S2 The frequency analysis result for the preodical structure of GL-2D-2

| 1 | 3149.614 | cm-1 | 56 | 1176.032 | cm-1 | 111 | 499.9436 | cm-1 |
| --- | --- | --- | --- | --- | --- | --- | --- | --- |
| 2 | 3143.165 | cm-1 | 57 | 1169.38 | cm-1 | 112 | 495.7715 | cm-1 |
| 3 | 3141.49 | cm-1 | 58 | 1167.719 | cm-1 | 113 | 492.7715 | cm-1 |
| 4 | 3140.745 | cm-1 | 59 | 1110.84 | cm-1 | 114 | 486.6018 | cm-1 |
| 5 | 3134.389 | cm-1 | 60 | 1108.823 | cm-1 | 115 | 475.5572 | cm-1 |
| 6 | 3133.778 | cm-1 | 61 | 1076.802 | cm-1 | 116 | 470.9486 | cm-1 |
| 7 | 3130.574 | cm-1 | 62 | 1074.53 | cm-1 | 117 | 464.8754 | cm-1 |
| 8 | 3129.937 | cm-1 | 63 | 1052.871 | cm-1 | 118 | 463.4203 | cm-1 |
| 9 | 3123.327 | cm-1 | 64 | 1052.242 | cm-1 | 119 | 461.3532 | cm-1 |
| 10 | 3116.503 | cm-1 | 65 | 1048.006 | cm-1 | 120 | 433.3931 | cm-1 |
| 11 | 3115.847 | cm-1 | 66 | 1046.868 | cm-1 | 121 | 430.2633 | cm-1 |
| 12 | 3114.673 | cm-1 | 67 | 972.207 | cm-1 | 122 | 429.7969 | cm-1 |
| 13 | 2263.647 | cm-1 | 68 | 972.0471 | cm-1 | 123 | 424.5573 | cm-1 |
| 14 | 2261.358 | cm-1 | 69 | 970.9816 | cm-1 | 124 | 420.3877 | cm-1 |
| 15 | 2259.112 | cm-1 | 70 | 966.3769 | cm-1 | 125 | 415.1882 | cm-1 |
| 16 | 2258.728 | cm-1 | 71 | 908.3701 | cm-1 | 126 | 393.851 | cm-1 |
| 17 | 2194.888 | cm-1 | 72 | 907.1206 | cm-1 | 127 | 374.1247 | cm-1 |
| 18 | 2186.327 | cm-1 | 73 | 904.564 | cm-1 | 128 | 372.5639 | cm-1 |
| 19 | 2144.303 | cm-1 | 74 | 902.8248 | cm-1 | 129 | 371.0956 | cm-1 |
| 20 | 2134.688 | cm-1 | 75 | 868.6951 | cm-1 | 130 | 362.7294 | cm-1 |
| 21 | 2080.833 | cm-1 | 76 | 863.5569 | cm-1 | 131 | 343.7283 | cm-1 |
| 22 | 2074.013 | cm-1 | 77 | 829.5973 | cm-1 | 132 | 313.9614 | cm-1 |
| 23 | 1574.05 | cm-1 | 78 | 829.2089 | cm-1 | 133 | 306.555 | cm-1 |
| 24 | 1573.276 | cm-1 | 79 | 798.7423 | cm-1 | 134 | 299.9932 | cm-1 |
| 25 | 1554.519 | cm-1 | 80 | 796.3668 | cm-1 | 135 | 289.5968 | cm-1 |
| 26 | 1551.934 | cm-1 | 81 | 794.1595 | cm-1 | 136 | 286.1099 | cm-1 |
| 27 | 1548.05 | cm-1 | 82 | 790.3698 | cm-1 | 137 | 274.1733 | cm-1 |
| 28 | 1548.031 | cm-1 | 83 | 787.634 | cm-1 | 138 | 271.5125 | cm-1 |
| 29 | 1531.432 | cm-1 | 84 | 763.9307 | cm-1 | 139 | 246.1816 | cm-1 |
| 30 | 1531.27 | cm-1 | 85 | 740.033 | cm-1 | 140 | 245.5373 | cm-1 |
| 31 | 1479.617 | cm-1 | 86 | 735.9889 | cm-1 | 141 | 242.2131 | cm-1 |
| 32 | 1478.952 | cm-1 | 87 | 733.3631 | cm-1 | 142 | 226.8575 | cm-1 |
| 33 | 1471.813 | cm-1 | 88 | 731.524 | cm-1 | 143 | 181.8558 | cm-1 |
| 34 | 1462.792 | cm-1 | 89 | 729.8378 | cm-1 | 144 | 177.6513 | cm-1 |
| 35 | 1424.852 | cm-1 | 90 | 660.7154 | cm-1 | 145 | 176.0037 | cm-1 |
| 36 | 1424.68 | cm-1 | 91 | 656.6112 | cm-1 | 146 | 164.7292 | cm-1 |
| 37 | 1419.524 | cm-1 | 92 | 609.8127 | cm-1 | 147 | 162.025 | cm-1 |
| 38 | 1404.317 | cm-1 | 93 | 609.5829 | cm-1 | 148 | 160.8824 | cm-1 |
| 39 | 1390.602 | cm-1 | 94 | 601.7074 | cm-1 | 149 | 158.8442 | cm-1 |
| 40 | 1380.695 | cm-1 | 95 | 600.9574 | cm-1 | 150 | 150.7633 | cm-1 |
| 41 | 1344.805 | cm-1 | 96 | 592.1195 | cm-1 | 151 | 129.3003 | cm-1 |
| 42 | 1342.606 | cm-1 | 97 | 591.7632 | cm-1 | 152 | 122.1991 | cm-1 |
| 43 | 1326.585 | cm-1 | 98 | 582.7658 | cm-1 | 153 | 112.9 | cm-1 |
| 44 | 1325.731 | cm-1 | 99 | 582.0271 | cm-1 | 154 | 110.687 | cm-1 |
| 45 | 1316.359 | cm-1 | 100 | 567.3709 | cm-1 | 155 | 94.02307 | cm-1 |
| 46 | 1315.085 | cm-1 | 101 | 550.8068 | cm-1 | 156 | 75.96052 | cm-1 |
| 47 | 1300.544 | cm-1 | 102 | 546.7154 | cm-1 | 157 | 72.39418 | cm-1 |
| 48 | 1300.09 | cm-1 | 103 | 546.0979 | cm-1 | 158 | 71.54261 | cm-1 |
| 49 | 1237.603 | cm-1 | 104 | 544.6182 | cm-1 | 159 | 69.95226 | cm-1 |
| 50 | 1232.398 | cm-1 | 105 | 541.4843 | cm-1 | 160 | 68.91643 | cm-1 |
| 51 | 1206.064 | cm-1 | 106 | 523.5796 | cm-1 | 161 | 65.12414 | cm-1 |
| 52 | 1205.701 | cm-1 | 107 | 523.1708 | cm-1 | 162 | 57.71205 | cm-1 |
| 53 | 1179.965 | cm-1 | 108 | 509.7147 | cm-1 | 163 | 53.94108 | cm-1 |
| 54 | 1179.25 | cm-1 | 109 | 508.3951 | cm-1 | 164 | 52.3783 | cm-1 |
| 55 | 1177.557 | cm-1 | 110 | 504.8316 | cm-1 | 165 | 19.20409 | cm-1 |

Table S3 Stiffness matrix (coefficients in GPa) of GL-2D-1

19.86 -11.815 0.67726 -3.8409 2.2905 0.08413

-11.815 4.6112 4.1673 -1.7762 0.53934 -0.16798

0.67726 4.1673 -1.2538 0.10425 -0.15937 0.29854

-3.8409 -1.7762 0.10425 -2.3047 0.20566 -0.32312

2.2905 0.53934 -0.15937 0.20566 -0.89719 0.04442

0.08413 -0.16798 0.29854 -0.32312 0.04442 -0.75405

Table S4 Eigenvalue of stiffness matrix of GL-2D-1

| λ1 | λ2 | λ3 | λ4 | λ5 | λ6 |
| --- | --- | --- | --- | --- | --- |
| -7.3852 GPa | -2.0408 GPa | -0.95406 GPa | -0.70322 GPa | 3.6447 GPa | 26.7 GPa |

Table S5 Modulus of GL-2D-1 under different model

| Averaging scheme | Bulk modulus | Young's modulus | Shear modulus |
| --- | --- | --- | --- |
| Voigt | *K*V = 1.0307 GPa | *E*V = 2.6266 GPa | *G*V = 1.2213 GPa |
| Reuss | *K*R = 2.5145 GPa | *E*R = -6.0252 GPa | *G*R = -1.5861 GPa |
| Hill | *K*H = 1.7726 GPa | *E*H = -0.5666 GPa | *G*H = -0.18239 GPa |

Table S6 Stiffness matrix (coefficients in GPa) of GL-2D-2

16.628 -5.9447 1.5839 -0.16424 0.24377 0.07575

-5.9447 6.7222 0.01908 -0.24946 0.45781 0.16409

1.5839 0.01908 -0.19385 0.00132 -0.22302 -0.01506

-0.16424 -0.24946 0.00132 -0.29852 0.04661 0.19298

0.24377 0.45781 -0.22302 0.04661 0.34566 -0.03485

0.07575 0.16409 -0.01506 0.19298 -0.03485 -0.01877

Table S7 Eigenvalue of stiffness matrix of GL-2D-2

| **λ1** | **λ2** | **λ3** | **λ4** | **λ5** | **λ6** |
| --- | --- | --- | --- | --- | --- |
| -0.57611 GPa | -0.37016 GPa | 0.079978 GPa | 0.40383 GPa | 4.131 GPa | 19.516 GPa |

Table S8 Modulus of GL-2D-2 under different model

| Averaging scheme | Bulk modulus | Young's modulus | Shear modulus |
| --- | --- | --- | --- |
| Voigt | *K*V = 1.6081 GPa | *E*V = 3.9942 GPa | *G*V = 1.8389 GPa |
| Reuss | *K*R = -240.99 GPa | *E*R = 1.5553 GPa | *G*R = 0.51807 GPa |
| Hill | *K*H = -119.69 GPa | *E*H = 3.5471 GPa | *G*H = 1.1785 GPa |


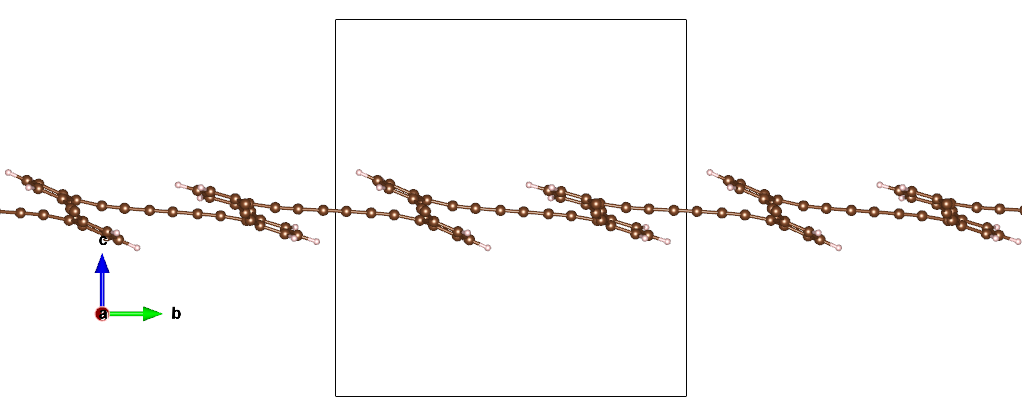


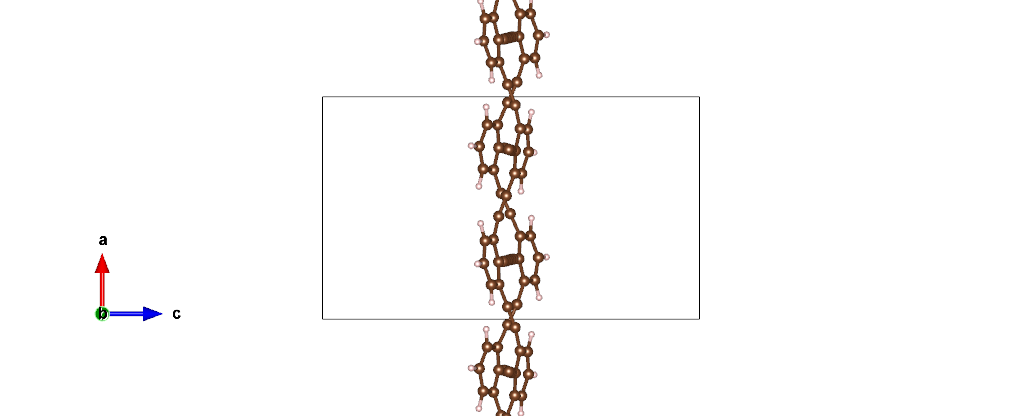


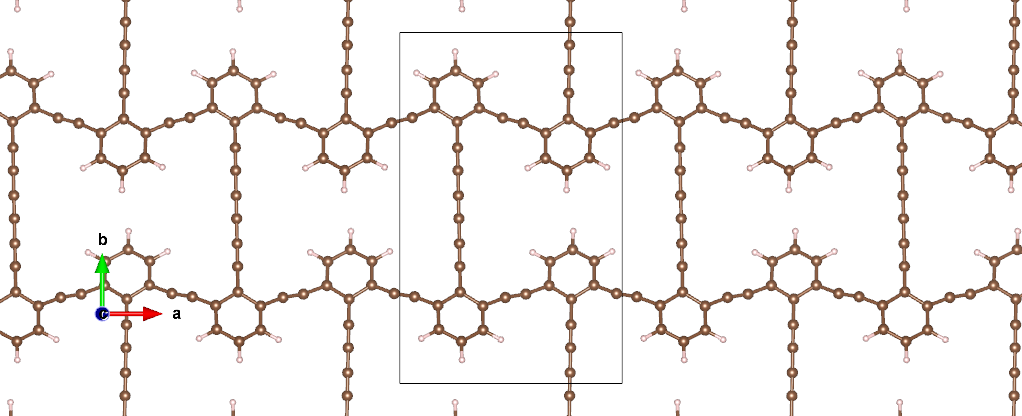


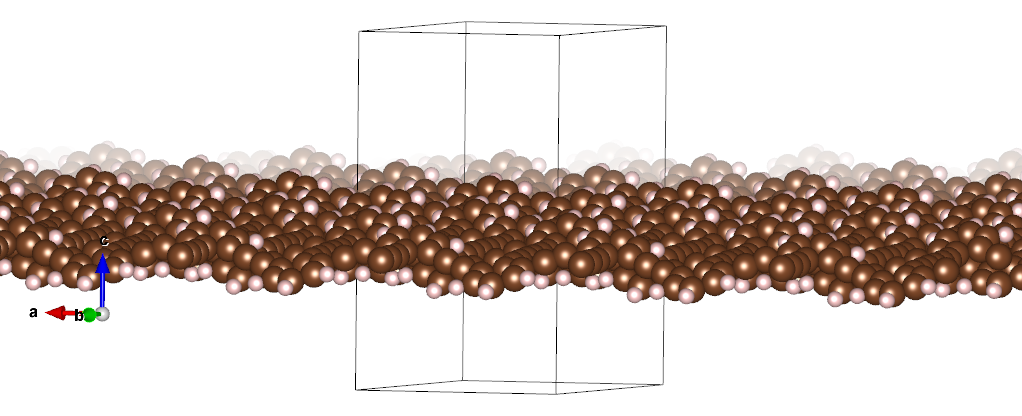


**Figure S4** The configuration of the supercell of GL-2D-2 at three orthogonal directions of *a, b, c* and standard orientation.

1. * *corresponding author, e-mail:* [*tsnuyk@yeah.net*](mailto:tsnuyk@yeah.net)*; yuankun@tsnu.edu.cn* [↑](#footnote-ref-1)
